# Supplementary material for: Human Immunodeficiency Virus (HIV)-Infected Patients Accept Finger Stick Blood Collection for Point-Of-Care CD4 Testing
Source: PubMed Central journal article supplement (PMC4996420; doi:10.1371/journal.pone.0161891), 2016-08-24
Supplement: pone.0161891.s002.pdf [file pone.0161891.s002.pdf]

**Appendix 3A: Questionnaire for first 150 patients recruited on standard SOP arm [a finger stick per test requested]**

**PATIENT INFORMATION**

Patient number: \_\_\_\_\_

Age: \_\_\_\_\_

Sex:  M  F

**PATIENT PARTICIPATION**

1. Did the patient consent to participate in the study:  Y  N

2. For both the patients that consented into the study AND those that did not consent, please tick which tests were requested by the doctor for the patient:

CD4

Hb

ALT

Creatinine

3. For patients who consent into the study please continue to ask the patient the questions on page 2 section 3 below **after taking their blood** for POC testing

3.1. How did it feel after having your finger stick/s?

- It was fine
- It hurt
- I don't know

3.2. Was finger stick worse than having your blood taken from your arm?

- Yes
- No
- It felt the same
- I don't know

3.3. Please rate the level of pain you experienced for each of the finger sticks, on a **scale of 1 to 4**

(where 1 = no pain; 2 = minimal pain; 3 = mild pain; 4 = severe pain)

CD4        scale\_\_\_\_\_

Hb         scale\_\_\_\_\_

ALT        scale\_\_\_\_\_

Creatinine scale\_\_\_\_\_

3.4. Which is most correct to you?

- I prefer x1 finger stick over x1 needle draw
- I prefer x2 finger sticks over x1 needle draw
- I prefer x3 or more finger sticks over x1 needle draw

**NURSE COMMENT SECTION**

**Do you have any additional comments or things you would like to share?**

---

---

---
