# Supplementary material for: Human Immunodeficiency Virus (HIV)-Infected Patients Accept Finger Stick Blood Collection for Point-Of-Care CD4 Testing
Source: PubMed Central journal article supplement (PMC4996420; doi:10.1371/journal.pone.0161891), 2016-08-24
Supplement: pone.0161891.s007.pdf [file pone.0161891.s007.pdf]

# Multi-centrum evaluatie van referentie en point of care CD4 technologieën

Version 1.0 ; 20-NOV-2013

We zouden graag weten wat uw mening is over bloedafname door middel van vingerprik. Gelieve dit document een paar dagen na de prik in te vullen, als u geen symptomen meer heeft. U mag dit document aan de HIV/SOA receptie afgeven op uw volgende bezoek.

Administratieve nummer : .....

**Een paar dagen na** de prik (één keuze aanduiden)

- Ik heb liever de gewone bloedafname
- Ik heb liever de vingerprik
- Ik heb geen voorkeur

**Onmiddellijk na** de prik dacht ik:

- Ik heb liever de gewone bloedafname
- Ik heb liever de vingerprik
- Ik heb geen voorkeur

Waarom ? (één of meerdere keuzes aanduiden)

- Pijn
  - Duur van de pijn na venipuncture: ..... uur
  - Duur van de pijn na vingerprik: ..... uur
- Bloeding
  - Duur van de bloeding na venipuncture: ..... minute
  - Duur van de bloeding na vingerprik: ..... minute
- Wond heropend
- Infectie
- Zichtbare wond
- Vervelende tape
- Andere : .....
- .....

Alle andere commentaren of details over uw antwoord (aangezien uw situatie etc):.....  
.....  
.....  
.....
